301 Moved Permanently


# 301 Moved Permanently
